# Supplementary material for: The fate of land evaporation – A global dataset
Source: Copernicus journal article supplement (doi:10.5194/essd-2019-246), 2020-01-27
Supplement: Supplementary file [file essd-2019-246-AC1-supplement.pdf]

**Table S1 Top 10 sources of precipitation for the country Brazil – Comparison between results from the 3D QIBT model (fed with NCEP-DOE AMIP-II data (Kanamitsu et al., 2002) for wind and evaporation and CMAP data (Xie and Arkin, 1997) for precipitation) and the WAM-2layers model (fed with ERA-Interim data (Berrisford et al., 2011; Dee et al., 2011)) – Sources appearing in both lists are displayed in bold font; UA = Unassigned**

| Rank | Top 10 sources of precipitation for Brazil in % |      |                  |      |
|------|-------------------------------------------------|------|------------------|------|
|      | 3D QIBT                                         |      | WAM-2layers      |      |
| 1    | <b>Brazil</b>                                   | 46.3 | <b>Sea</b>       | 63.3 |
| 2    | <b>Sea</b>                                      | 43.3 | <b>Brazil</b>    | 28.9 |
| 3    | <b>Bolivia</b>                                  | 2.4  | <b>Bolivia</b>   | 1.2  |
| 4    | <b>Peru</b>                                     | 1.3  | <b>Peru</b>      | 0.6  |
| 5    | <b>Argentina</b>                                | 1.2  | <b>Argentina</b> | 0.6  |
| 6    | <b>Paraguay</b>                                 | 0.9  | Angola           | 0.4  |
| 7    | Nigeria                                         | 0.6  | <b>Paraguay</b>  | 0.4  |
| 8    | Côte d'Ivoire                                   | 0.5  | Venezuela        | 0.3  |
| 9    | Ghana                                           | 0.4  | Guyana           | 0.3  |
| 10   | Other land                                      | 2.9  | Other land + UA  | 4.0  |

**Table S2 Top 10 sources of precipitation for the country Egypt – Comparison between results from the 3D QIBT model (fed with NCEP-DOE AMIP-II data (Kanamitsu et al., 2002) for wind and evaporation and CMAP data (Xie and Arkin, 1997) for precipitation) and the WAM-2layers model (fed with ERA-Interim data (Berrisford et al., 2011; Dee et al., 2011)) – Sources appearing in both lists are displayed in bold font; UA = Unassigned**

| Rank | Top 10 sources of precipitation for Egypt in % |      |                            |      |
|------|------------------------------------------------|------|----------------------------|------|
|      | 3D QIBT                                        |      | WAM-2layers                |      |
| 1    | <b>Sea</b>                                     | 82.4 | <b>Sea</b>                 | 76.6 |
| 2    | <b>Libya</b>                                   | 3.3  | <b>Egypt</b>               | 2.7  |
| 3    | <b>Egypt</b>                                   | 2.8  | <b>Turkey</b>              | 1.9  |
| 4    | <b>Algeria</b>                                 | 1.4  | <b>Greece</b>              | 1.2  |
| 5    | <b>Greece</b>                                  | 1.0  | <b>Libya</b>               | 1.1  |
| 6    | Spain                                          | 1.0  | <b>Sudan / South Sudan</b> | 0.9  |
| 7    | <b>Sudan / South Sudan</b>                     | 0.7  | <b>Algeria</b>             | 0.9  |
| 8    | Morocco                                        | 0.6  | Nigeria                    | 0.8  |
| 9    | <b>Turkey</b>                                  | 0.6  | United States              | 0.8  |
| 10   | Other land                                     | 6.0  | Other land + UA            | 13.1 |

**Table S3 Top 10 sources of precipitation for the country Laos – Comparison between results from the 3D QIBT model (fed with NCEP-DOE AMIP-II data (Kanamitsu et al., 2002) for wind and evaporation and CMAP data (Xie and Arkin, 1997) for precipitation) and the WAM-2layers model (fed with ERA-Interim data (Berrisford et al., 2011; Dee et al., 2011)) – Sources appearing in both lists are displayed in bold font; UA = Unassigned fractions due to system boundary losses**

| Rank | Top 10 sources of precipitation for Laos in % |      |                 |      |
|------|-----------------------------------------------|------|-----------------|------|
|      | 3D QIBT                                       |      | WAM-2layers     |      |
| 1    | <b>Sea</b>                                    | 56.3 | <b>Sea</b>      | 70.0 |
| 2    | <b>Thailand</b>                               | 9.4  | <b>Thailand</b> | 6.4  |
| 3    | <b>Burma</b>                                  | 6.9  | <b>Laos</b>     | 4.1  |
| 4    | <b>Laos</b>                                   | 6.6  | <b>India</b>    | 3.9  |
| 5    | <b>India</b>                                  | 6.2  | <b>Burma</b>    | 3.6  |
| 6    | <b>China</b>                                  | 5.2  | <b>China</b>    | 3.4  |
| 7    | <b>Vietnam</b>                                | 4.0  | <b>Vietnam</b>  | 1.9  |
| 8    | <b>Cambodia</b>                               | 2.2  | <b>Cambodia</b> | 1.3  |
| 9    | Pakistan                                      | 0.4  | Indonesia       | 0.4  |
| 10   | Other land                                    | 2.9  | Other land + UA | 5.0  |
